# Supplementary material for: Fabrication of YxBi1−xVO4 solid solutions for efficient C2H4 photodegradation
Source: Royal Society of Chemistry journal article supplement (doi:10.1039/c4ta05872k), 2014-12-08
Supplement: c4ta05872k1.pdf [file c4ta05872k1.pdf]

## Supporting Information of

### Fabrication of $Y_xBi_{1-x}VO_4$ Solid Solutions for Efficient $C_2H_4$ Photodegradation

Peiqing Long, Yaohong Zhang, Xuxing Chen, and Zhiguo Yi\*

Key Laboratory of Design and Assembly of Functional Nanostructures, Fujian Institute of Research on the Structure of Matter, Chinese Academy of Sciences, Fuzhou 350002, China

#### S1 Xe lamp spectrum

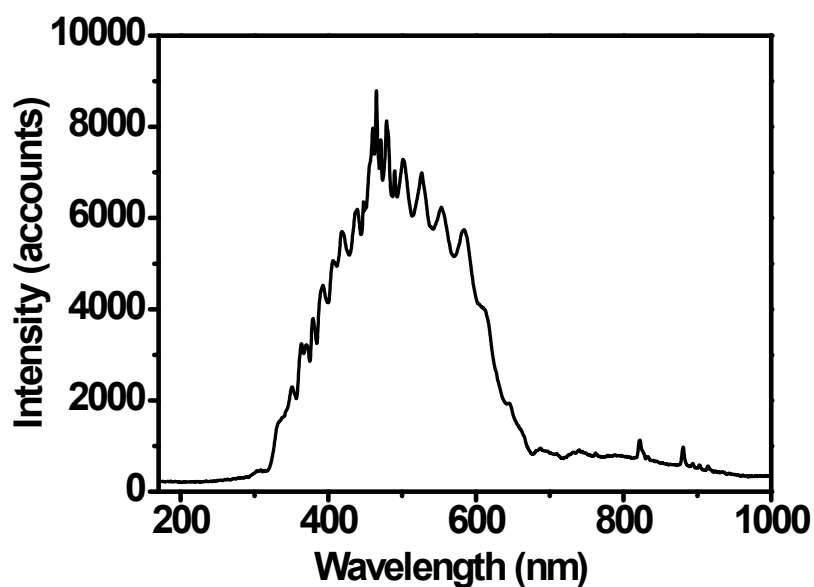

Fig. S1. The spectrum of the Xe lamp.

---

\* Email: zhiguo@fjirsm.ac.cn

**S2 XRD patterns:**

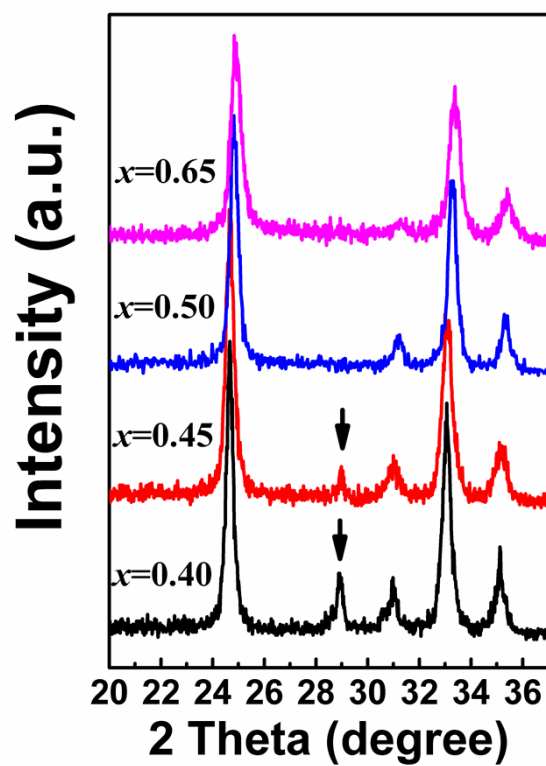

Fig. S2 Room temperature XRD patterns of  $Y_xBi_{1-x}VO_4$  powders close to the monoclinic/tetragonal phase boundary. The arrows indicate (121) plane of the monoclinic phase.

**S3 SEM images:**

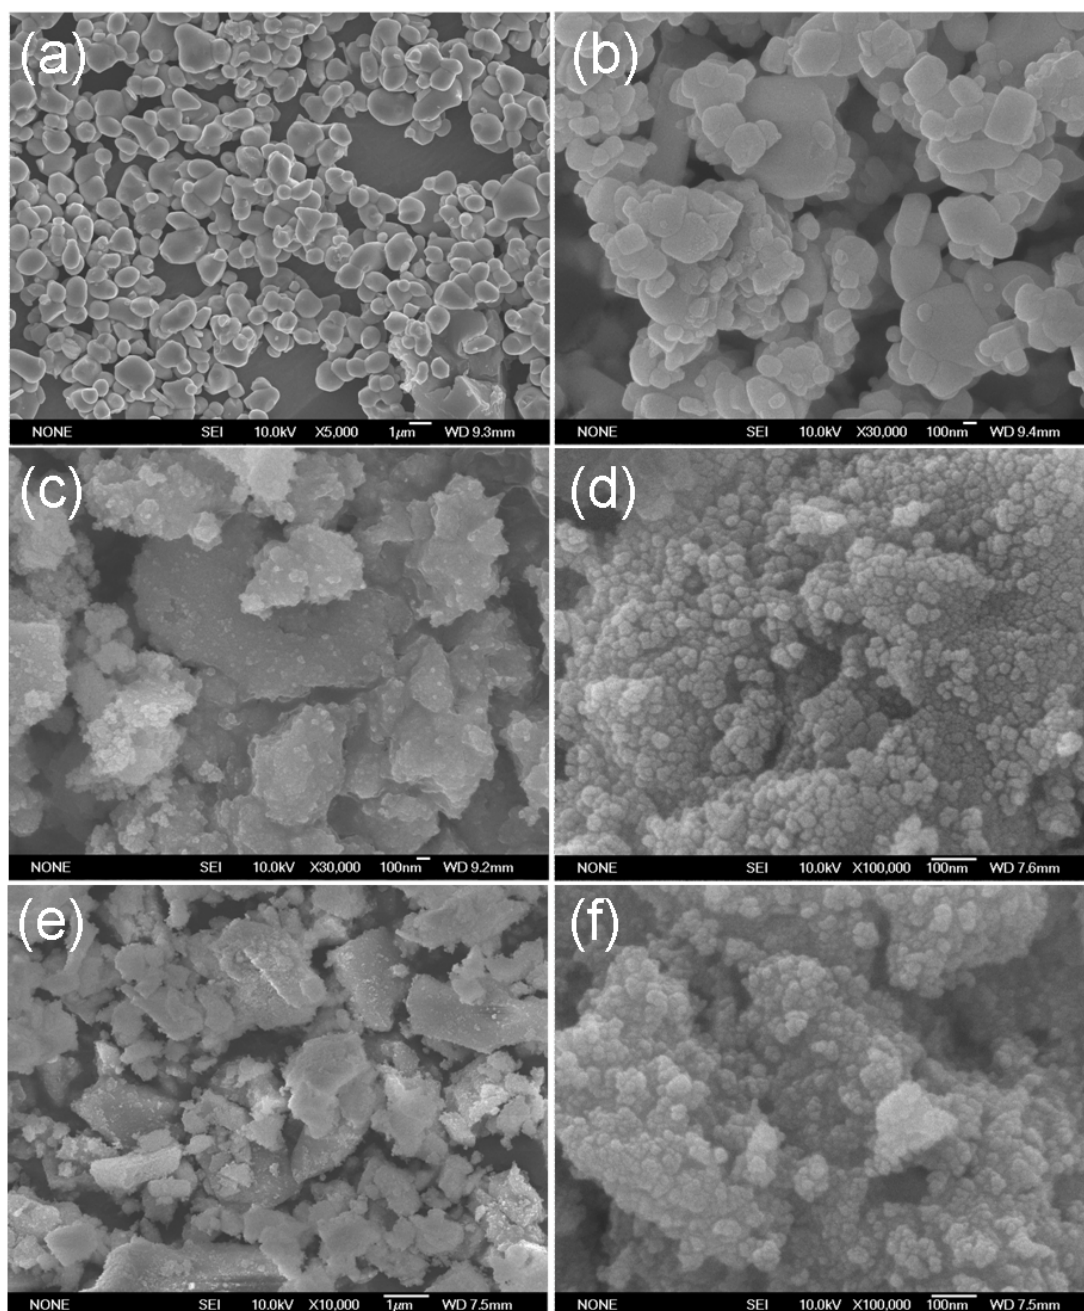

Fig. S3 SEM images of the as prepared samples: (a) BiVO<sub>4</sub>, (b) Y<sub>0.25</sub>Bi<sub>0.75</sub>VO<sub>4</sub>, (c-d) Y<sub>0.85</sub>Bi<sub>0.15</sub>VO<sub>4</sub>, (e-f) YVO<sub>4</sub>.

### S4-5 element mapping analysis

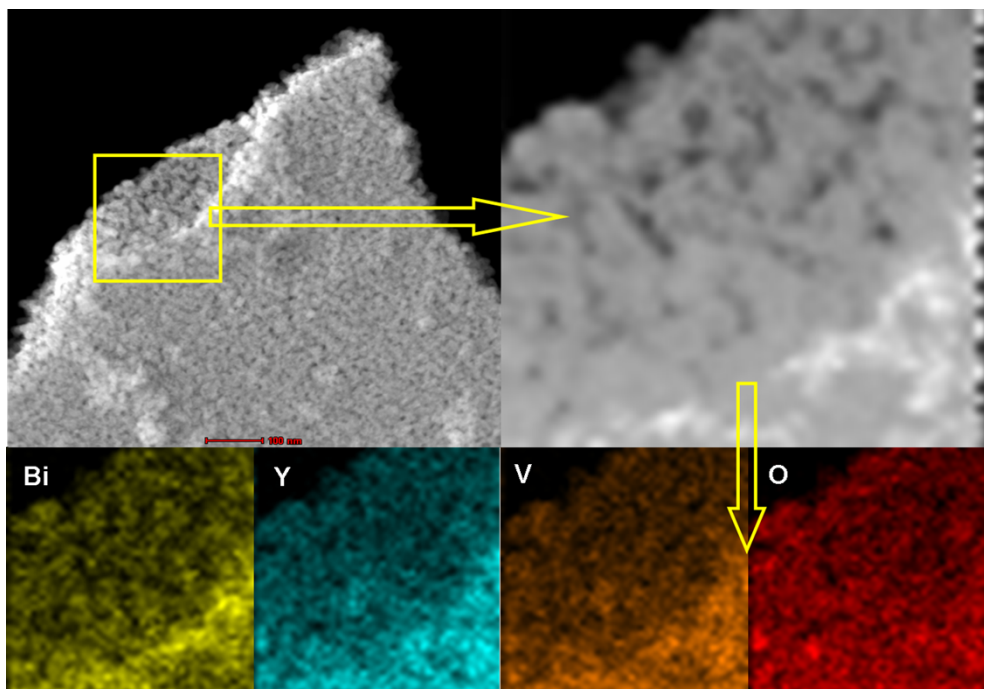

Fig. S4 The high angle annular dark field-scanning transmission electron microscopy (HAADF-STEM) image of  $Y_{0.85}Bi_{0.15}VO_4$  (top panels) and elemental mapping patterns (bottom panels) for the boxed area.

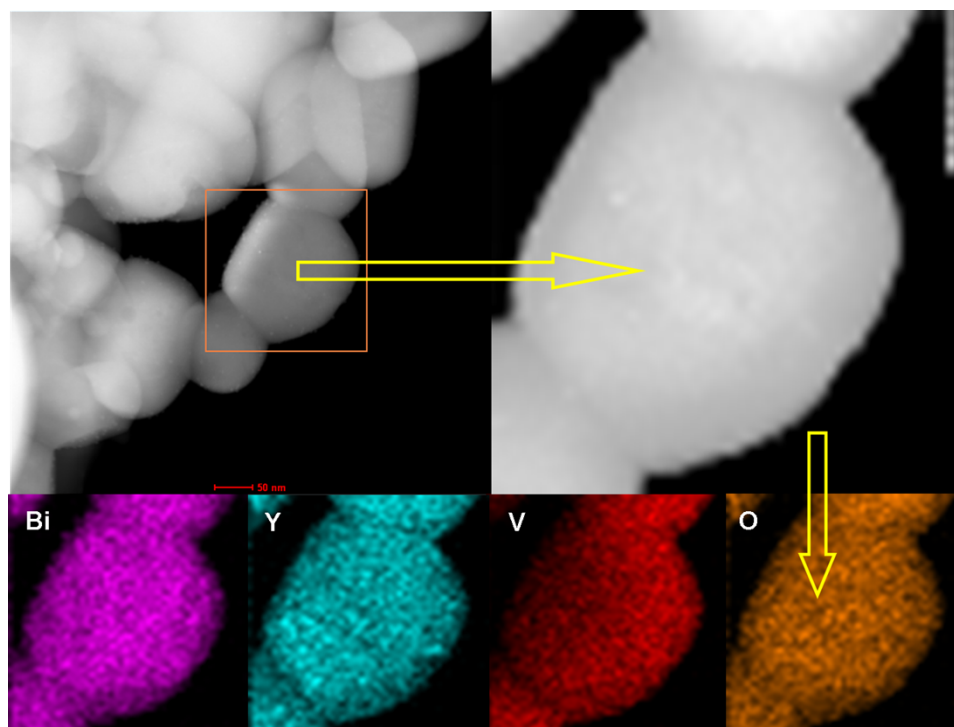

Fig. S5 The high angle annular dark field-scanning transmission electron microscopy (HAADF-STEM) image of  $Y_{0.25}Bi_{0.75}VO_4$  (top panels) and elemental mapping patterns (bottom panels) for the boxed area.

S6Tauc plots:

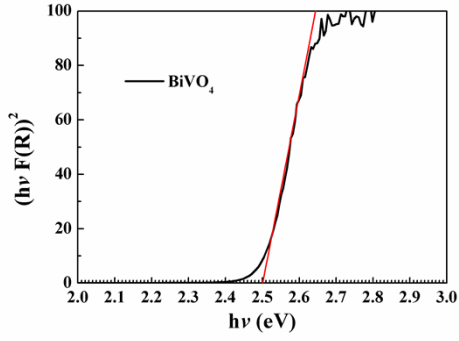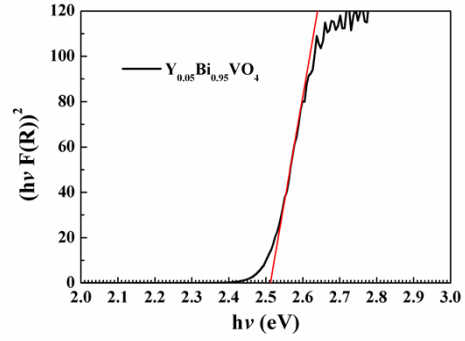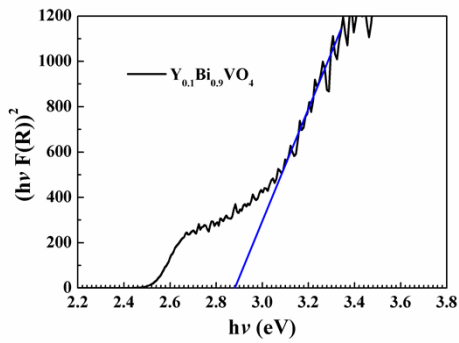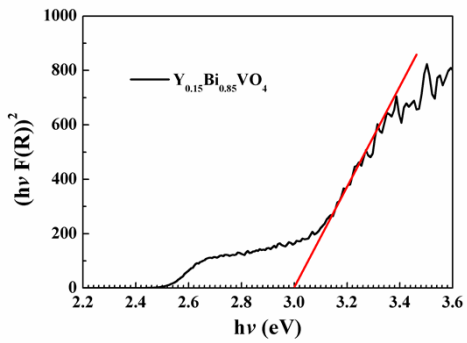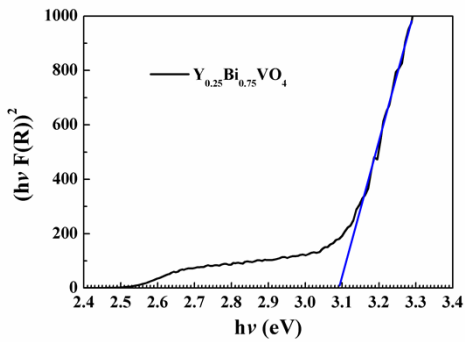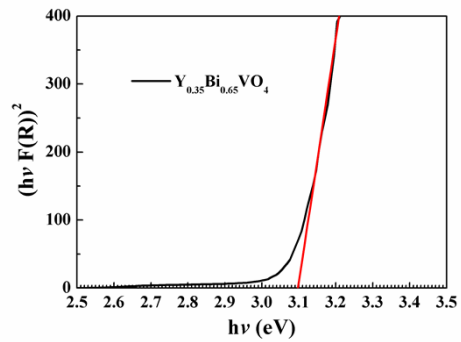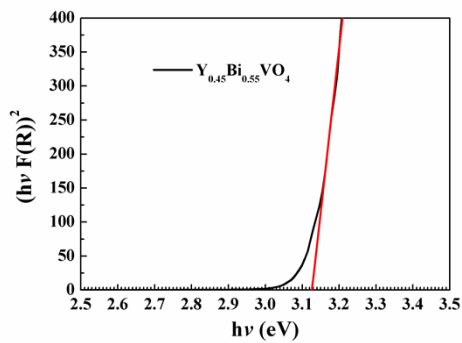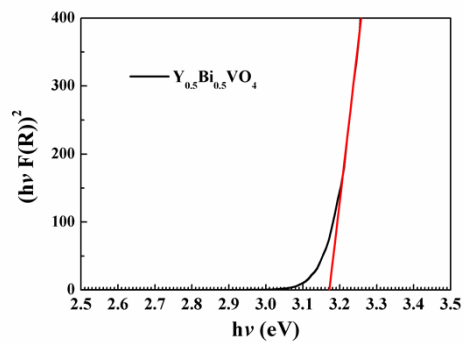

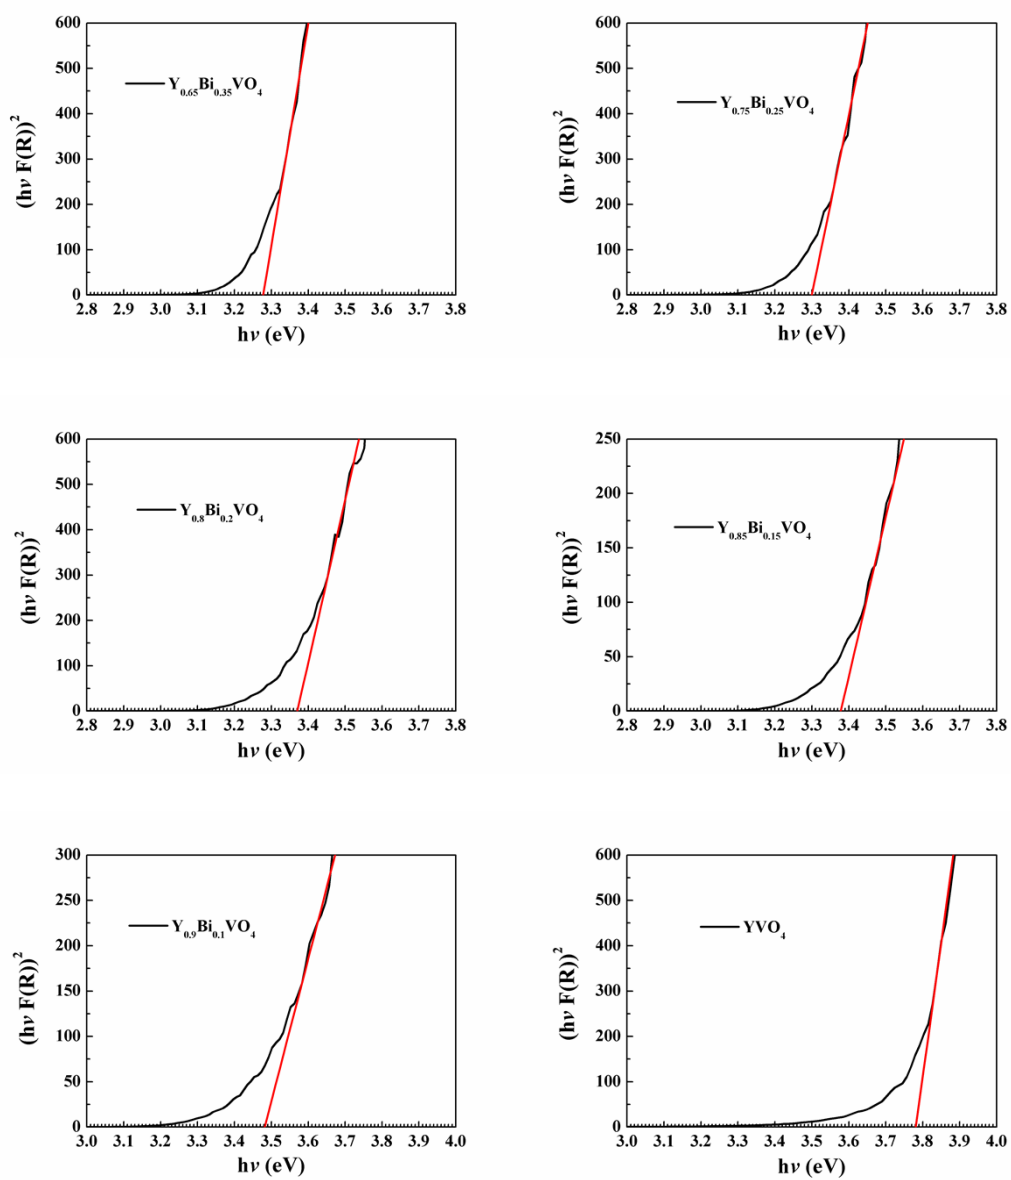

Fig. S6 Tauc plots of the  $Y_xBi_{1-x}VO_4$  photocatalysts.

### S7 Mott-Schottky analysis:

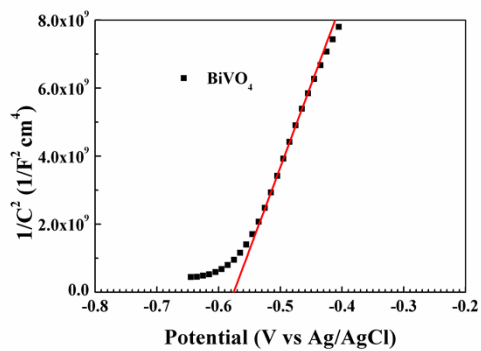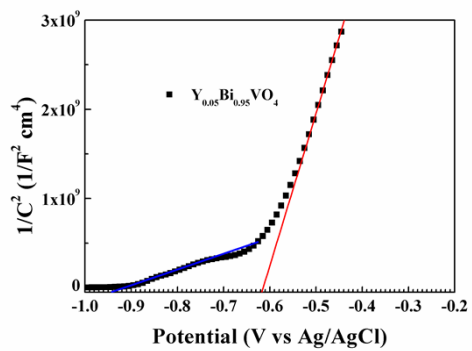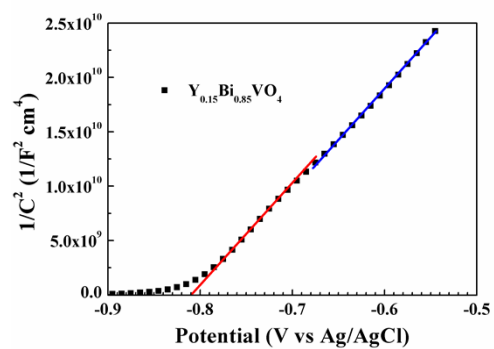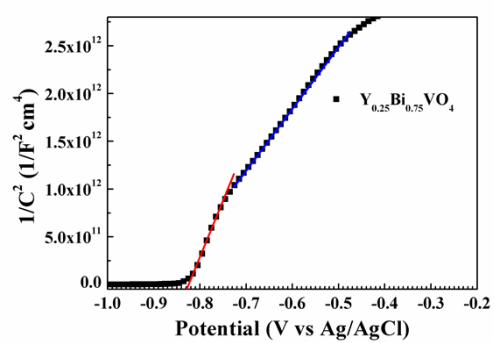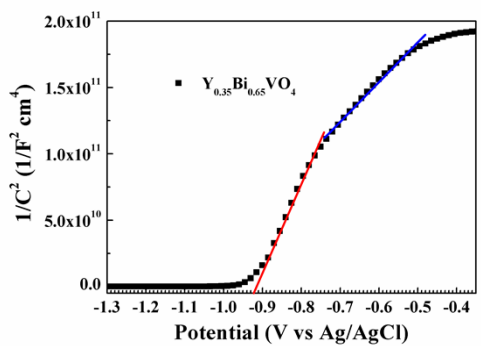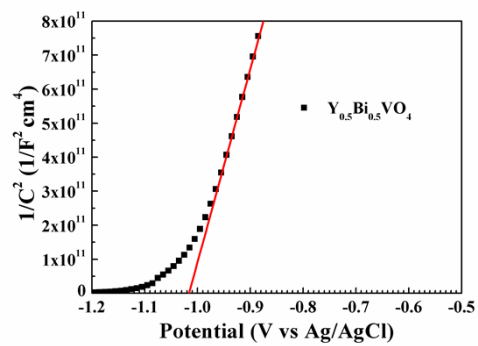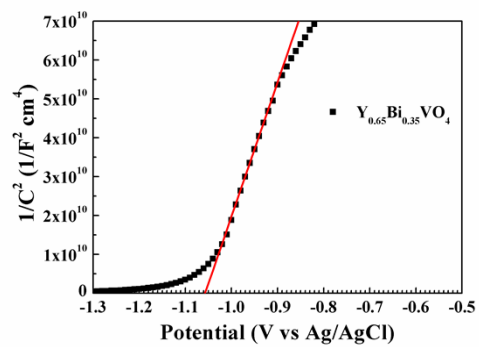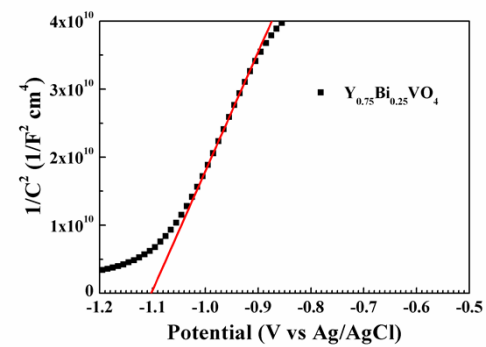

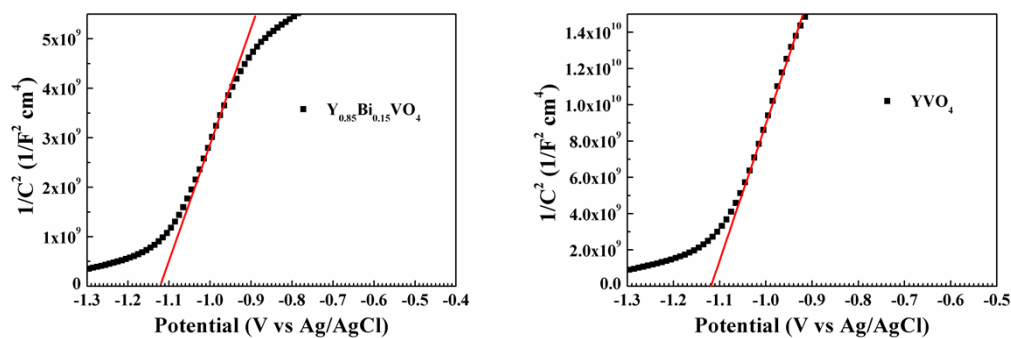

Fig. S7 Mott-Schottky plots of the  $Y_xBi_{1-x}VO_4$  photocatalysts.

**S8  $C_2H_4$  degradation kinetics:**

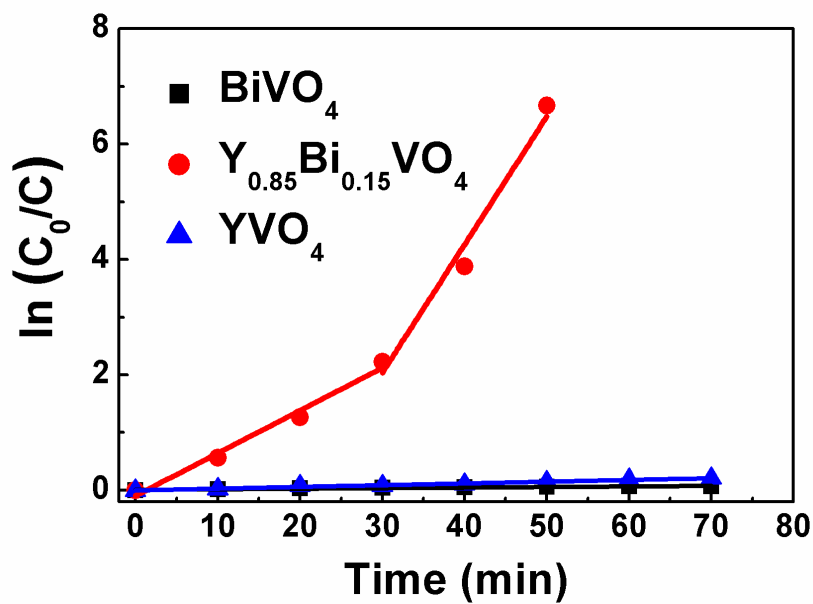

Fig. S8  $C_2H_4$  photodegradation kinetics of different samples.



### S9. Turnover number calculations:

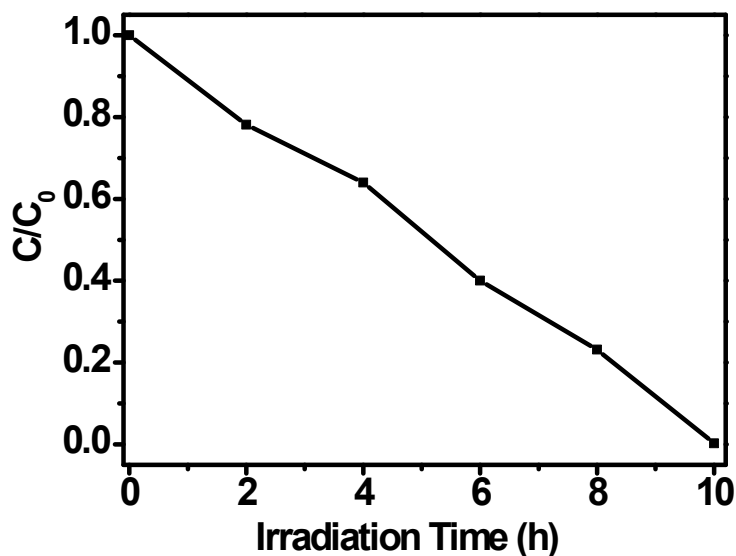

Fig. S9  $C_2H_4$  photodegradation test upon  $Y_{0.85}Bi_{0.15}VO_4$  powder under fixed-bed flow gas mode (catalyst: 0.15 g; reaction gas: a mixture of 5 mL  $C_2H_4$  and 5mL  $O_2$  with  $N_2$  atmosphere).

**Note:**

Reaction formula:  $C_2H_4 + 3O_2 \rightarrow 2CO_2 + 2H_2O$

The number of electrons gain and loss in the reaction:  $12 \cdot e^{-1}$

The amount of substance 5 mL  $C_2H_4$ :  $n_1 = 0.015/22.4 \text{ mol} = 2.2321 \times 10^{-4} \text{ mol}$

The total amount of substance of electrons gain and loss in the photo-degradation of 5 mL  $C_2H_4$ :

$$n_2 = 12 \times 2.2321 \times 10^{-4} \text{ mol} = 2.6786 \times 10^{-3} \text{ mol}$$

For the  $Y_{0.85}Bi_{0.15}VO_4$ :

The amount of substance:  $n_3 = 6.7568 \times 10^{-4} \text{ mol}$

The Turnover number:  $n = 2.6786 \times 10^{-3} / 6.7568 \times 10^{-4} = 3.9643$

### S10: Flow mode degradation of C<sub>2</sub>H<sub>4</sub>:

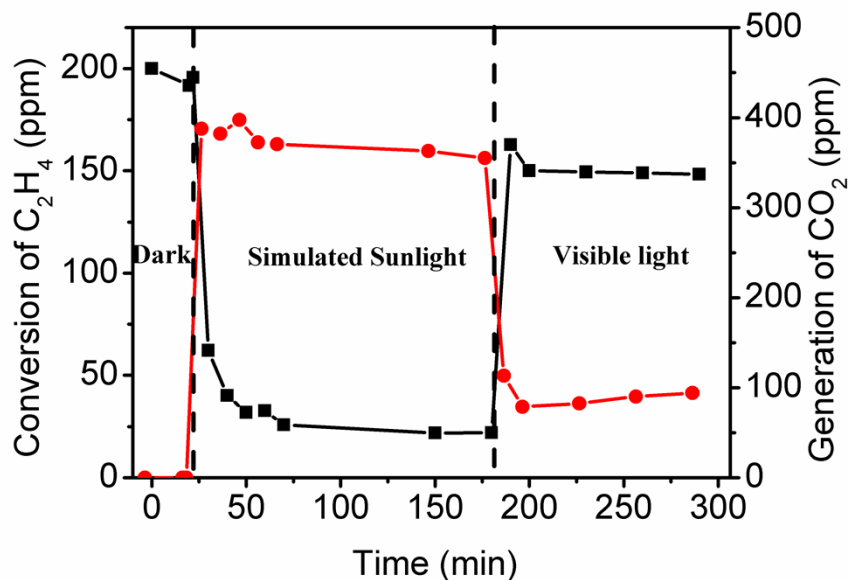

Fig. S10 C<sub>2</sub>H<sub>4</sub> photodegradation test upon Y<sub>0.85</sub>Bi<sub>0.15</sub>VO<sub>4</sub> powder under fixed-bed flow gas mode (catalyst: 0.8 g; reaction gas: a mixture of 200 ppm C<sub>2</sub>H<sub>4</sub> and O<sub>2</sub> with N<sub>2</sub> carrier; Flow speed: 10 mL/min).

### S11 Raman spectra of photocatalyst

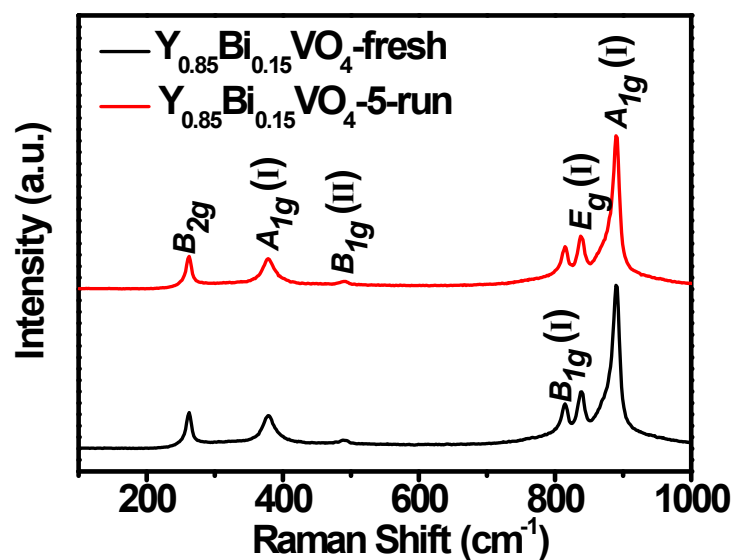

Fig. S11 The Raman spectra of the Y<sub>0.85</sub>Bi<sub>0.15</sub>VO<sub>4</sub> samples before (Y<sub>0.85</sub>Bi<sub>0.15</sub>VO<sub>4</sub>-fresh) and after (Y<sub>0.85</sub>Bi<sub>0.15</sub>VO<sub>4</sub>-5 run) five cycles of C<sub>2</sub>H<sub>4</sub> photo-degradation.

## S12 Photocatalytic degradation of RhB

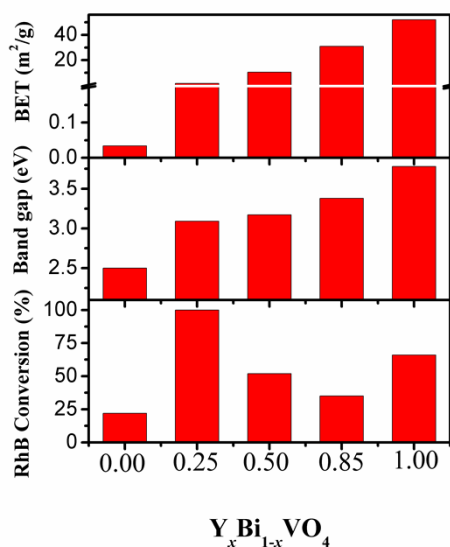

Fig. S12 Composition of BET surfaces, band gaps and RhB photodegradation efficiencies of the  $Y_xBi_{1-x}VO_4$  photocatalysts. The Photocatalytic degradation of rhodamine B (RhB) were carried out as follows: First, 0.1 g of the  $Y_xBi_{1-x}VO_4$  powder was mixed with RhB (2 mL, with a concentration of  $40\text{ mg L}^{-1}$ ) in a 198 mL  $H_2O$  solution. Then, the suspension was magnetically stirred for 1 h to reach a complete adsorption-desorption equilibrium in the dark and subsequently exposed to the sunlight simulator irradiation with maximum illumination time up to 180 min. The excitation source is a 300 W xenon lamp located at ca. 12.2 cm away from the suspension surface. During the irradiation, the suspension was continuously stirred and the reaction system was kept in ice-bath. Before irradiation and at certain time intervals, about 7 mL suspensions were sampled and centrifuged for three times to remove the residual before characterization. The concentration of RhB was determined by measuring the absorbance in step time using the UV-vis-NR spectrophotometers (Lambda-900, PerkinElmer).
